# Supplementary material for: Enhancing the efficiency of asymmetric supercapacitors using high-performance Fe-doped CoWO4 electrodes
Source: Royal Society of Chemistry journal article supplement (doi:10.1039/d4nj04855e), 2025-01-01
Supplement: d4nj04855e1.pdf [file d4nj04855e1.pdf]

## **SUPPORTING INFORMATION**

### **Enhancing the efficiency of Asymmetric Supercapacitors using high performances Fe-Doped CoWO<sub>4</sub> electrodes**

T. Kamalesh <sup>a,1</sup>, Palanisamy Rajkumar <sup>b,1</sup>, Sethuraman Venkatesan <sup>c</sup>, Akshaya Subhramaniyan Rasappan <sup>d</sup>, Adel El-marghany <sup>e</sup>, Sankaiya Asaithambi <sup>f,\*</sup>, Jinho Kim <sup>b,\*</sup>

<sup>a</sup> Department of Physics, B. S. Abdur Rahman Crescent Institute of Science and Technology, Chennai, Tamil Nadu, 603210, India.

<sup>b</sup> Department of Mechanical Engineering, Yeungnam University, Gyeongsan-si, Gyeongbuk-do 38541, Republic of Korea.

<sup>c</sup> Research and Development, New Energy Technology Centre, Lithium-Ion Division, Amara Raja Battery Ltd., Karakambadi, Tirupati, Andhra Pradesh, 517520, India

<sup>d</sup> Materials Design Division, Department of Physics, Chemistry and Biology (IFM), Linköping University, Linköping, Sweden.

<sup>e</sup> Department of Chemistry, College of Science, King Saud University, P.O. Box 2455, Riyadh 11451, Saudi Arabia

<sup>f</sup> Nanotechnology & Advanced Materials Engineering, Sejong University, 209 Neungdong-ro, Gwangjin-gu, Seoul, 143-747, Republic of Korea.

\*E-mail: [asaithambi901@gmail.com](mailto:asaithambi901@gmail.com) (SA); [jinho@ynu.ac.kr](mailto:jinho@ynu.ac.kr) (JK)

<sup>1</sup> These authors contributed equally to this work.

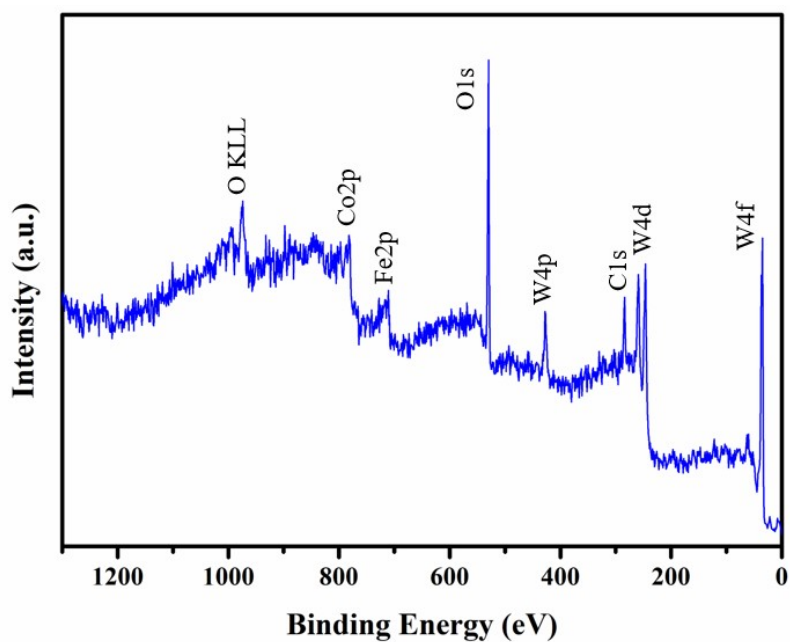

**Figure S1:** XPS survey spectrum of the prepared Fe-CoWO<sub>4</sub> sample

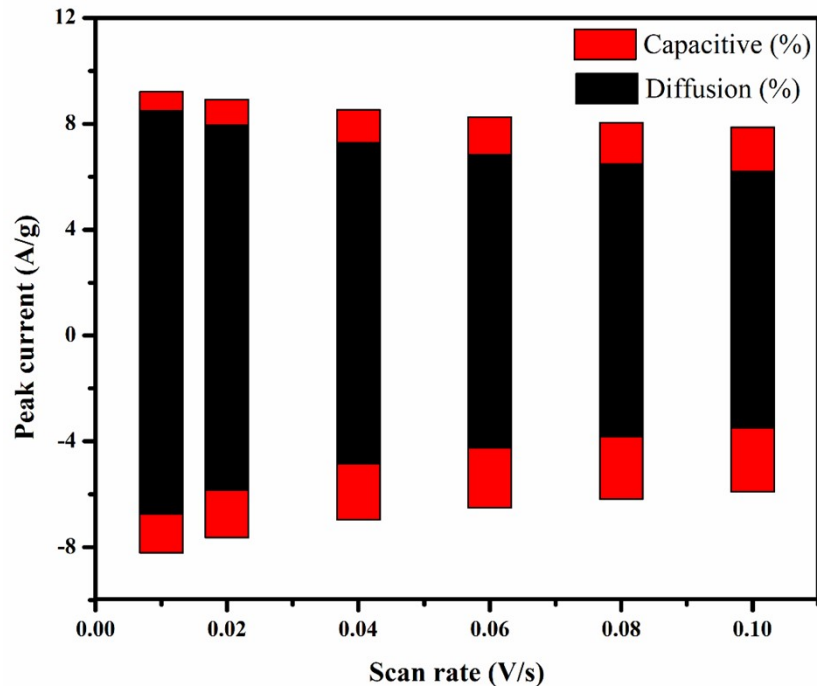

**Figure S2:** Contribution ratio of diffusion-controlled and capacitive-controlled processes of Fe-CoWO<sub>4</sub> electrode
